# Supplementary material for: Genomic characterization of the adolescent idiopathic scoliosis-associated transcriptome and regulome
Source: PubMed Central journal article supplement — Hum Mol Genet. 2020 Nov 12;29(22):3606–15. doi: 10.1093/hmg/ddaa242 (PMC7823110; doi:10.1093/hmg/ddaa242), 2020-11-12
Supplement: supplemental_table_1_e_ddaa242.pdf [file supplemental_table_1_e_ddaa242.pdf]

Supplemental Table 1

| <b>Enhancer Candidate</b> | <b>Forward Primer Sequence</b> | <b>Reverse Primer Sequence</b> | <b>Length (bp)</b> |
|---------------------------|--------------------------------|--------------------------------|--------------------|
| <i>ADGRG6_1</i>           | GGAATGGCTCACAATTCTTCTT         | CAGTGCCAATCACCTTTATTCA         | 2904               |
| <i>ADGRG6_2</i>           | ATTTTCAGAGGAACCGGAAGAG         | TTTCATCTTGAACCACCTGGA          | 3066               |
| <i>ADGRG6_3</i>           | ATGCAACCTGTATTGGCTGTC          | TTGCAAGCCATGCTAGAGAAA          | 2904               |
| <i>ADGRG6_4</i>           | CTGTTACCCACCTGTTTCGTGT         | CTTCAACTCCCAAAGCTGATG          | 2991               |
| <i>ADGRG6_5</i>           | ATTGAATCAAGGCTGAAACCA          | GGAGAATCCAAGCCAAAATTC          | 2924               |
| <i>ADGRG6_6</i>           | GTCACTGAGCCAAATCCTTTTC         | AACTTCTCTAGCCAGCCACTTG         | 2946               |
| <i>BNC2_1</i>             | TGCAATCACAGCCAGACTCTAT         | CCTTGTGCTAAACAAAGTGGTG         | 2913               |
| <i>BNC2_2</i>             | GATTTTCCTATGGAGCTGATCG         | GCTTGTGAGTTATGTTGCTTGG         | 2471               |
| <i>BNC2_3</i>             | AACCTCACCCGATCTCACATAC         | CATTGCTCTGAGATGACTCCAG         | 3065               |
