# Supplementary material for: Genomic characterization of the adolescent idiopathic scoliosis-associated transcriptome and regulome
Source: PubMed Central journal article supplement — Hum Mol Genet. 2020 Nov 12;29(22):3606–15. doi: 10.1093/hmg/ddaa242 (PMC7823110; doi:10.1093/hmg/ddaa242), 2020-11-12
Supplement: supplemental_table_2_ddaa242.pdf [file supplemental_table_2_ddaa242.pdf]

Supplemental Table 2

| <b>Tissue</b> | <b>Sample #</b> | <b>Patient ID</b> | <b>Thoracic level</b>     | <b>Age of patient at collection</b> |
|---------------|-----------------|-------------------|---------------------------|-------------------------------------|
| Bone          | 1               | IS1               | T10                       | 11                                  |
| Bone          | 2               | IS2               | T10                       | 13                                  |
| Bone          | 3               | IS3               | T10-11                    | 16                                  |
| Cartilage     | 1               | IS1               | T10, T11, T12             | 11                                  |
| Cartilage     | 2               | IS2               | T4, T8, T10               | 13                                  |
| Cartilage     | 3               | IS3               | T7-8, T8-9, T10-11, T9-10 | 16                                  |
| Muscle        | 1               | IS4               | site not specified        | 12                                  |
| Muscle        | 2               | IS5               | site not specified        | 17                                  |
| Muscle        | 3               | IS6               | site not specified        | 13                                  |
