# Supplementary figures and images for: Genomic characterization of the adolescent idiopathic scoliosis-associated transcriptome and regulome
Source: PubMed Central journal article supplement — Hum Mol Genet. 2020 Nov 12;29(22):3606–15. doi: 10.1093/hmg/ddaa242 (PMC7823110; doi:10.1093/hmg/ddaa242), 2020-11-12

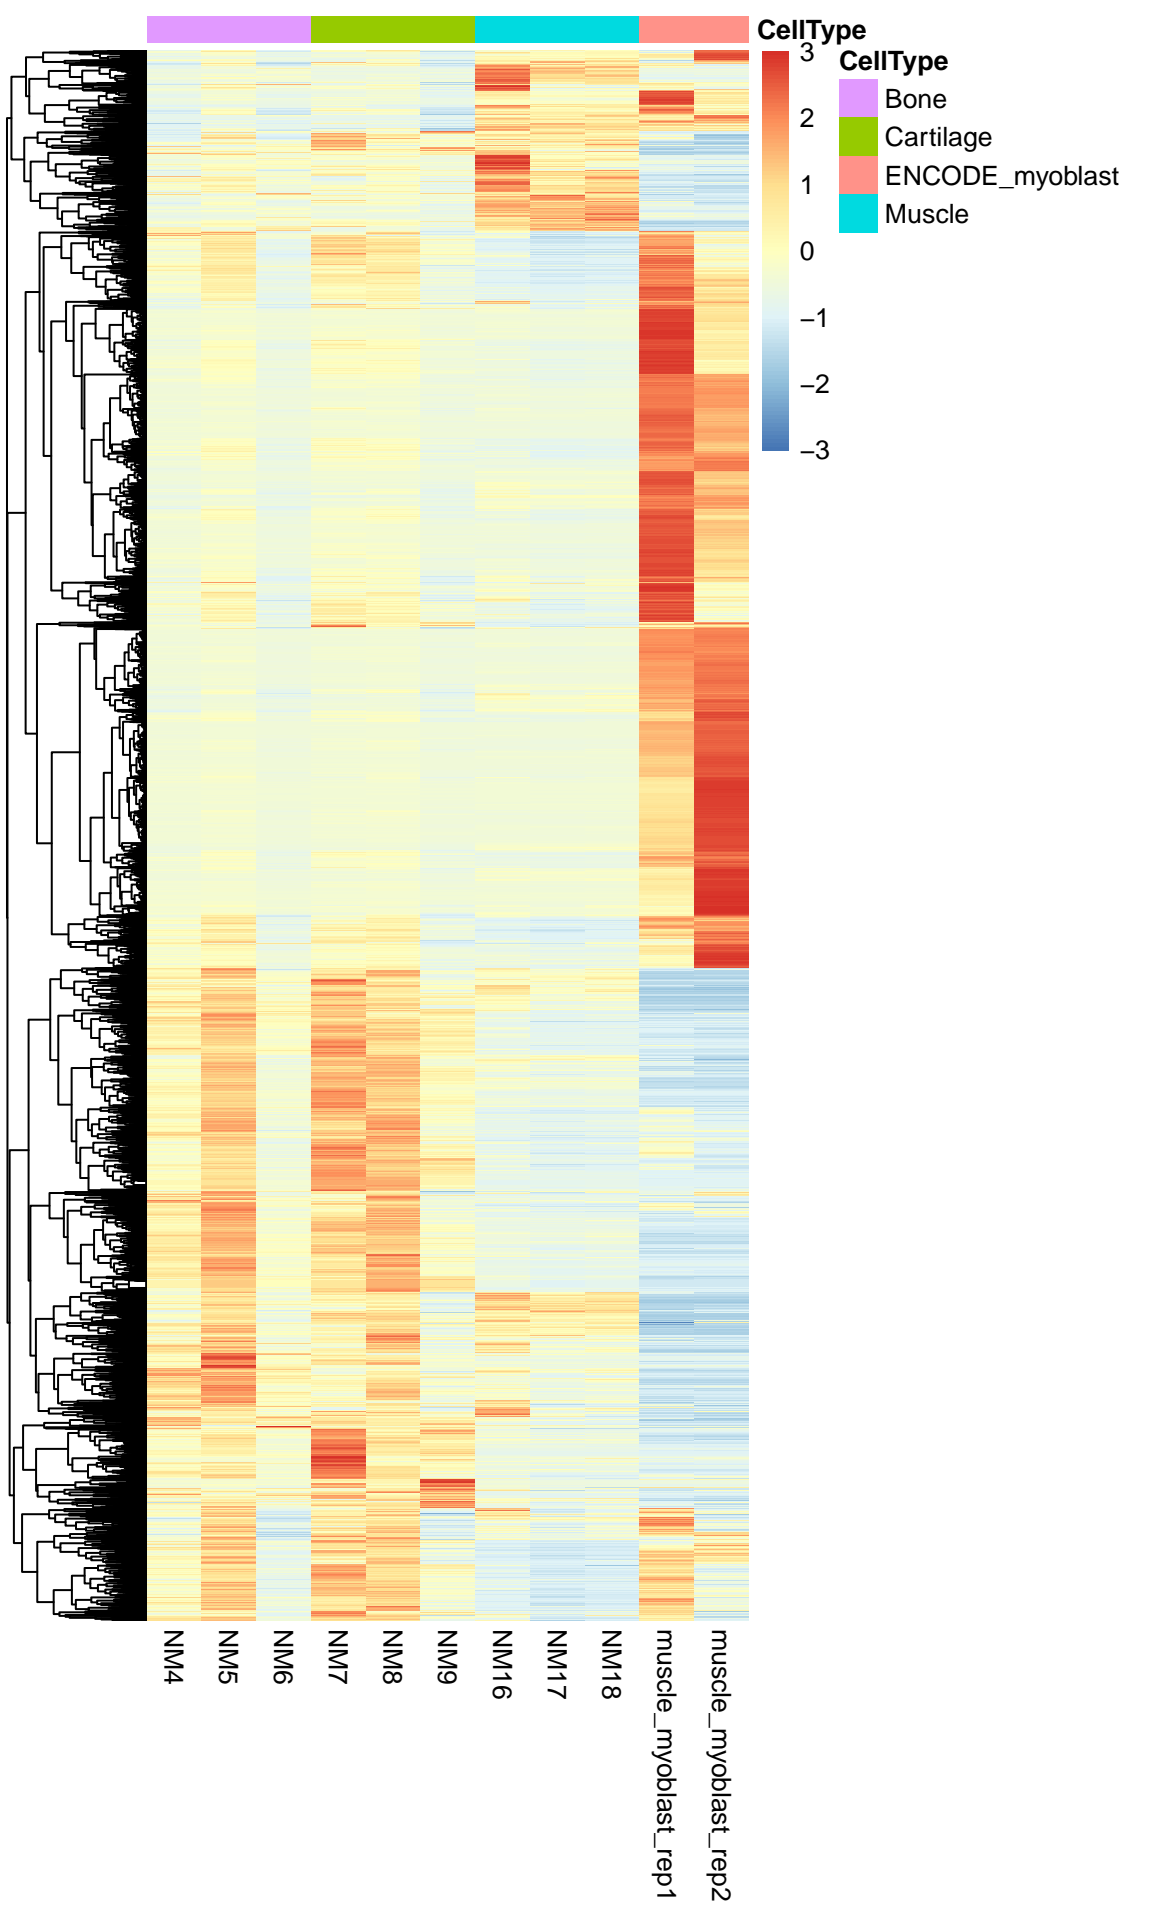

Supplement: supplemental_figure_2_ddaa242.pdf [file supplemental_figure_2_ddaa242.pdf]

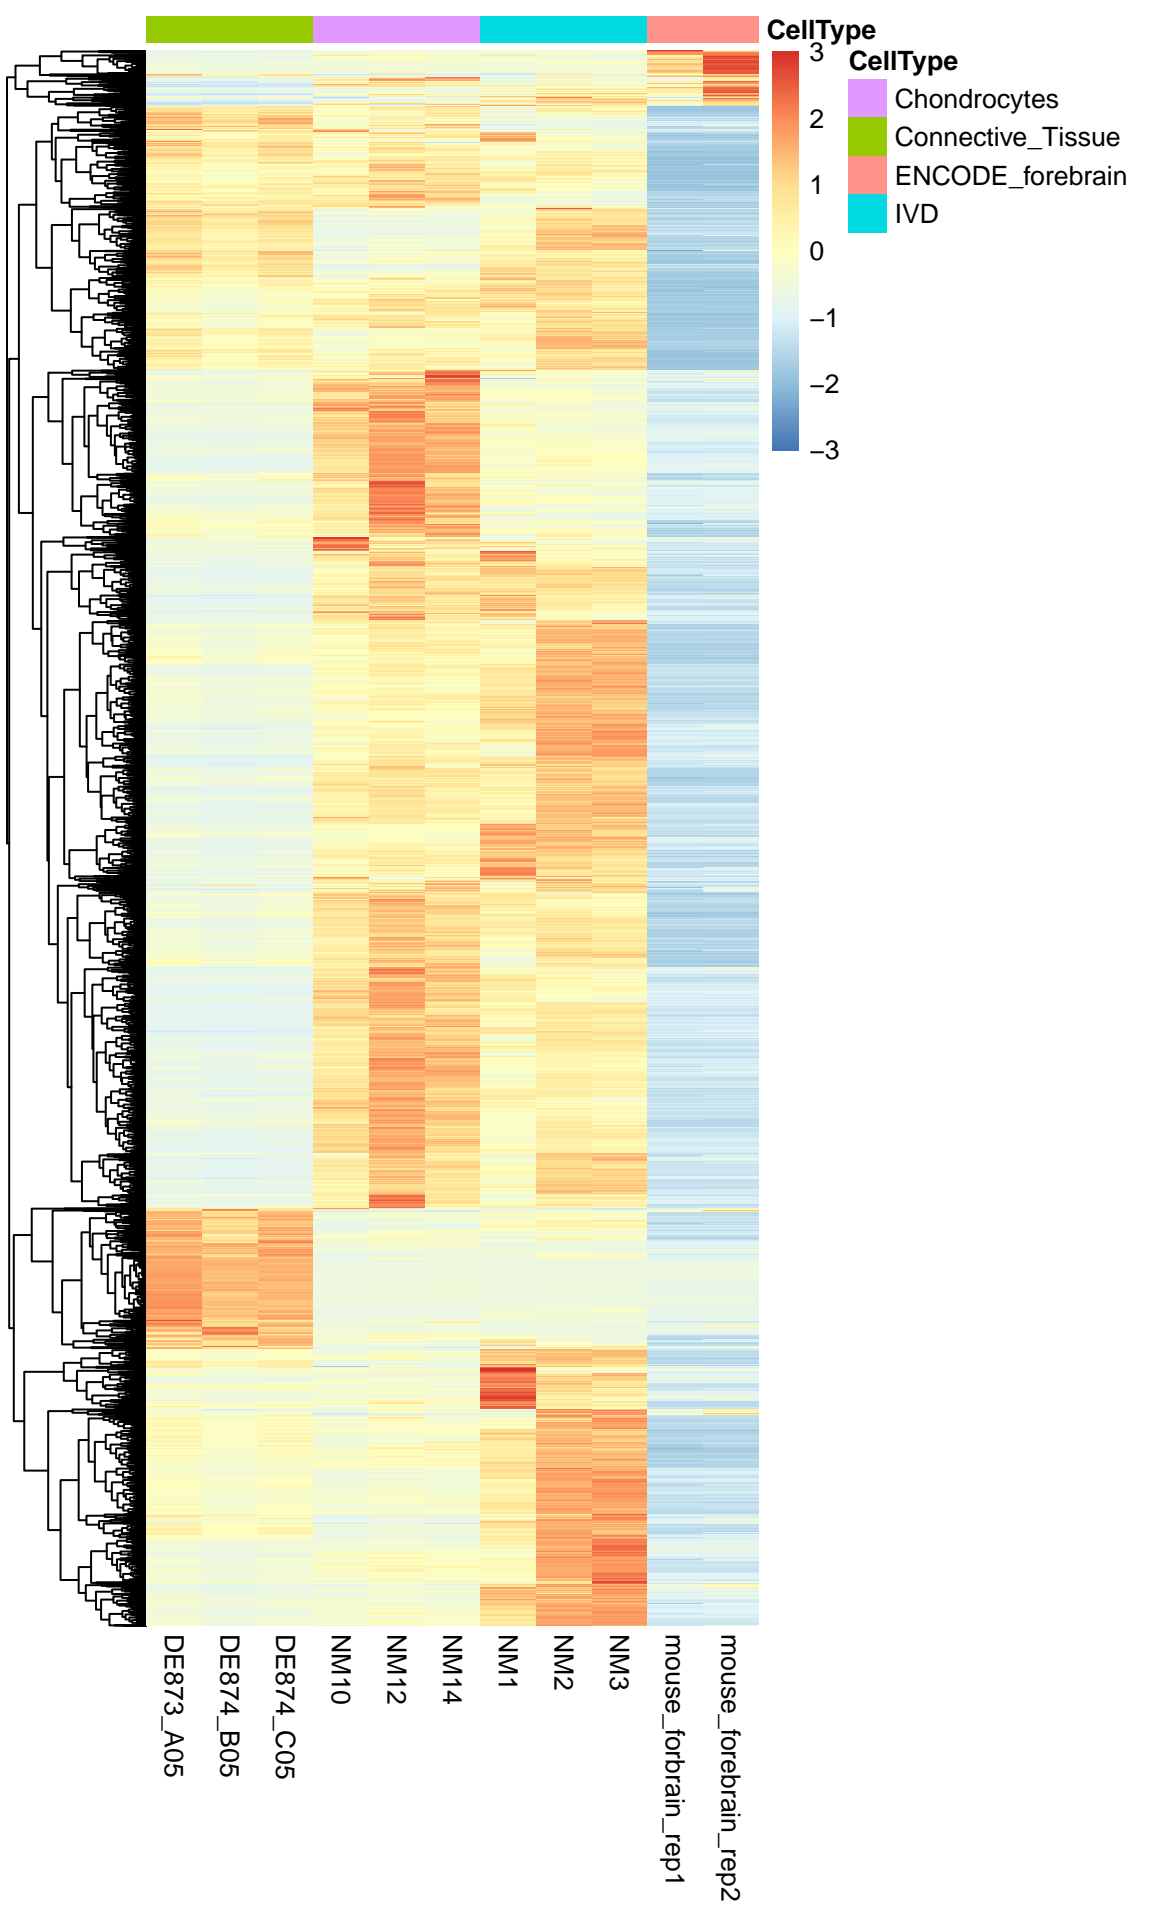

Supplement: supplemental_figure_3_ddaa242.pdf [file supplemental_figure_3_ddaa242.pdf]
